# Supplementary material for: Stem cells for spinal cord injuries bearing translational potential
Source: PubMed Central journal article supplement — Neural Regen Res. 2018 Jan;13(1):35–42. doi: 10.4103/1673-5374.224360 (PMC5840986; doi:10.4103/1673-5374.224360), 2018-01
Supplement: NRR-13-35_Suppl1.pdf [file NRR-13-35_Suppl1.pdf]

**Additional Table 1 Clinical potentials of cell-based therapies for SCI within the next decade.**

| Type of cells                 | Source of cells                                                           | Procedure                                                                                                                                                                                                                                                                                                                                                                                                                                                                                                                                                                                                                                                                                                                                                                                                                                                                      | S-R&D                                        | PP | References                                                                         |
|-------------------------------|---------------------------------------------------------------------------|--------------------------------------------------------------------------------------------------------------------------------------------------------------------------------------------------------------------------------------------------------------------------------------------------------------------------------------------------------------------------------------------------------------------------------------------------------------------------------------------------------------------------------------------------------------------------------------------------------------------------------------------------------------------------------------------------------------------------------------------------------------------------------------------------------------------------------------------------------------------------------|----------------------------------------------|----|------------------------------------------------------------------------------------|
| OECs                          | Olfactory mucosa (OM)                                                     | <ol style="list-style-type: none"> <li>1. Surgical sampling of the OM.</li> <li>2. Isolation and culture of OECs.</li> <li>3. Midline incision, laminectomy, durotomy at the injury site for the transplantation.</li> <li>4. Injection of the OECs suspension at different levels around the SCI injury.</li> </ol>                                                                                                                                                                                                                                                                                                                                                                                                                                                                                                                                                           | Clinical Trials Phase I/II                   | 4  | Féron et al., 2005; Mackay-Sim et al., 2008; Tabakow et al., 2013                  |
| Schwann cells (SCs)           | Sural nerve                                                               | <ol style="list-style-type: none"> <li>1. Surgical harvesting of the Sural nerve from the calf.</li> <li>2. Isolation and culture of SCs.</li> <li>3. Midline incision, laminectomy, durotomy at the injury site for the transplantation.</li> <li>4. Injection of the SCs suspension at different levels around the SCI.</li> </ol>                                                                                                                                                                                                                                                                                                                                                                                                                                                                                                                                           | Clinical Trials Phase I                      | 1  | Saberi, 2011; Zhou et al., 2012                                                    |
| Immunomodulatory cells        | Peripheral blood                                                          | <ol style="list-style-type: none"> <li>1. Harvesting of peripheral blood and dermis.</li> <li>2. Isolation and culture of monocytes and <i>ex vivo</i> incubation with autologous dermis for autologous incubated macrophages induction.</li> <li>3. Midline incision, laminectomy, durotomy at the injury site for the transplantation.</li> <li>4. Injection of the cell suspension at different levels around the SCI (other immunomodulatory cells are to be tested).</li> </ol>                                                                                                                                                                                                                                                                                                                                                                                           | Clinical Trials Phase II                     | 2  | Lammertse et al., 2012                                                             |
| Mesenchymal stem cells (MSCs) | Bone marrow (BM), adipose tissue, umbilical cord                          | <ol style="list-style-type: none"> <li>1. Aspiration of BM, liposuction, harvesting of umbilical cord samples or cord blood and other less common methods,</li> <li>2. Isolation and culture of MSCs.</li> <li>3. Midline incision, laminectomy, durotomy at the injury site for the transplantation or minimally invasive microsurgical techniques or simple lumbar puncture.</li> <li>4. Injection of the MSCs suspension at different levels around the SCI.</li> </ol>                                                                                                                                                                                                                                                                                                                                                                                                     | Clinical Trials Phase I/II                   | 3  | Ra et al., 2011; Karamouzian et al., 2012; Dai et al., 2013; Mendonça et al., 2014 |
| hESCs                         | Blastocyst                                                                | The exact methodology used has not been disclosed yet by the company.                                                                                                                                                                                                                                                                                                                                                                                                                                                                                                                                                                                                                                                                                                                                                                                                          | Clinical Trial Phase I/IIa                   | 7  | Lebkowski, 2014; Asterias Biotherapeutics Inc., 2015                               |
| FSCs                          | Fetal central nervous system (CNS) tissue (brain, spinal cord)            | The exact methodology used has not been disclosed yet by the companies.                                                                                                                                                                                                                                                                                                                                                                                                                                                                                                                                                                                                                                                                                                                                                                                                        | Clinical Trial Phase I/II                    | 8  | NeuralStem Inc., 2015; StemCells Inc., 2015a, b                                    |
| iPSCs                         | Fibroblasts (or blood, MSCs and other less common sources being explored) | <ol style="list-style-type: none"> <li>1. Pre-evaluated human induced pluripotent stem cell-derived neural stem/progenitor cells (hiPS-NS/PCs) derived from the safe human iPSC (hiPSC) clone, 201B7 cells were used for the transplantation.</li> <li>2. The hiPSCs were cultured with a specific protocol to develop iPSC-derived primary neurospheres. 12 days later, the primary neurospheres were then passaged into secondary and tertiary neurospheres and used for transplantation.</li> <li>3. A moderate contusive SCI was induced in 10 marmosets using a modified New York University (NYU) weight-drop device and approximately 1 million cells/5 µL in cell culture medium without added growth factors were injected into the lesion epicenter. Control animals received an injection of an equal volume of phosphate buffered saline (PBS) instead.</li> </ol> | Preclinical studies using non-human primates | 9  | Kobayashi et al., 2012                                                             |

SCI: Spinal cord injury; S-R&D: stage of R&D bench, preclinical or clinical; PP: possible product within 10 years (1–10), 10 the strongest.
